# Supplementary material for: Controlled Synthesis and Enhanced Gas Sensing Performance of Zinc-Doped Indium Oxide Nanowires
Source: MDPI journal article supplement (doi:10.3390/nano13071170), 2023-03-25
Supplement: s1 [file s1]

# Supporting Information

## Controlled Synthesis and Enhanced Gas Sensing Performance of Zinc-Doped Indium Oxide Nanowires

Che-Wen Yu <sup>1</sup>, Hsuan-Wei Fu <sup>1</sup>, Shu-Meng Yang <sup>1</sup>, Yu-Shan Lin <sup>1</sup> and Kuo-Chang Lu <sup>1,2\*</sup>

<sup>1</sup> Department of Materials Science and Engineering, National Cheng Kung University, Tainan 701, Taiwan; n56091352@gs.ncku.edu.tw (C.-W.Y.); n56091556@gs.ncku.edu.tw (H.-W.F.); n56074287@gs.ncku.edu.tw (S.-M.Y.); n56114053@gs.ncku.edu.tw (Y.-S.L.)

<sup>2</sup> Core Facility Center, National Cheng Kung University, Tainan 701, Taiwan

\* Correspondence: gkclu@mail.ncku.edu.tw; Tel.: +886-6-275-7575 (ext. 62920)

### List of contents

Figure S1 | Schematic illustration of the growth mechanism of Zn-In<sub>2</sub>O<sub>3</sub> nanowires. The reaction followed the VLS route(a)~(c).

Figure S2 | SEM image of zinc clusters on indium oxide nanowires.

Figure S3 | Composition analysis of(a) In<sub>2</sub>O<sub>3</sub> nanowire (b) 3 at% Zn-In<sub>2</sub>O<sub>3</sub> nanowire (c) 5 at% Zn-In<sub>2</sub>O<sub>3</sub> nanowire.

Figure S4 | The mapping images of(a) In<sub>2</sub>O<sub>3</sub> nanowire (b) 3 at% Zn-In<sub>2</sub>O<sub>3</sub> nanowire (c) 5 at% Zn-In<sub>2</sub>O<sub>3</sub> nanowire.

Figure S5 | (a,b) SEM images of single In<sub>2</sub>O<sub>3</sub> nanowire-based electrical measurement micro-device. I-V measurements of single In<sub>2</sub>O<sub>3</sub> nanowire. (c) R<sub>13+</sub> (d) R<sub>13-</sub> (e) R<sub>14+</sub> (f) R<sub>14-</sub> (g) R<sub>23+</sub> (h) R<sub>23-</sub> (i) R<sub>24+</sub> (j) R<sub>24-</sub>.

Figure S6 | (a,b) SEM image of single 3 at% Zn-In<sub>2</sub>O<sub>3</sub> nanowire-based electrical measurement micro-device. I-V measurements of 3 at% Zn-In<sub>2</sub>O<sub>3</sub> nanowire. (c) R<sub>13+</sub> (d) R<sub>13-</sub> (e) R<sub>14+</sub> (f) R<sub>14-</sub> (g) R<sub>23+</sub> (h) R<sub>23-</sub> (i) R<sub>24+</sub> (j) R<sub>24-</sub>.

Figure S7 | (a,b) SEM image of single 5 at% Zn-In<sub>2</sub>O<sub>3</sub> nanowire-based electrical measurement micro-device. I-V measurements of 5 at% Zn-In<sub>2</sub>O<sub>3</sub> nanowire. (c) R<sub>13+</sub> (d) R<sub>13-</sub> (e) R<sub>14+</sub> (f) R<sub>14-</sub> (g) R<sub>23+</sub> (h) R<sub>23-</sub> (i) R<sub>24+</sub> (j) R<sub>24-</sub>.

Figure S8 | (a-d) Dynamic gas sensing curves of single In<sub>2</sub>O<sub>3</sub> nanowire, 3 at% Zn-In<sub>2</sub>O<sub>3</sub> nanowire and 5 at% Zn-In<sub>2</sub>O<sub>3</sub> nanowire at 150 °C, 200 °C, 250 °C and 300 °C to 5 ppm acetone.

Figure S9 | (a-d) Dynamic gas sensing curves of single In<sub>2</sub>O<sub>3</sub> nanowire, 3 at% Zn-In<sub>2</sub>O<sub>3</sub> nanowire and 5 at% Zn-In<sub>2</sub>O<sub>3</sub> nanowire at 150 °C, 200 °C, 250 °C, and 300 °C to 5 ppm carbon monoxide.

Figure S10 | (a-d) Dynamic gas sensing curves of single In<sub>2</sub>O<sub>3</sub> nanowire, 3 at% Zn-In<sub>2</sub>O<sub>3</sub> nanowire and 5 at% Zn-In<sub>2</sub>O<sub>3</sub> nanowire at 150 °C, 200 °C, 250 °C and 300 °C to 5 ppm ethanol.

Figure S11 | Schematic illustration of the change of electron depletion region after n-type semiconductor absorbs reducing gas.

Table S1 | Summary of gas sensing performance of In<sub>2</sub>O<sub>3</sub>, 3 at% Zn-In<sub>2</sub>O<sub>3</sub>, 5 at% Zn-In<sub>2</sub>O<sub>3</sub> nanowires.

Table S2 | Comparison with previous sensing studies on In<sub>2</sub>O<sub>3</sub> nanowires with different dopants for

5ppm ethanol.

Table S3 | Comparison with previous sensing studies on  $\text{In}_2\text{O}_3$  nanostructures with different dopants for 5ppm acetone.

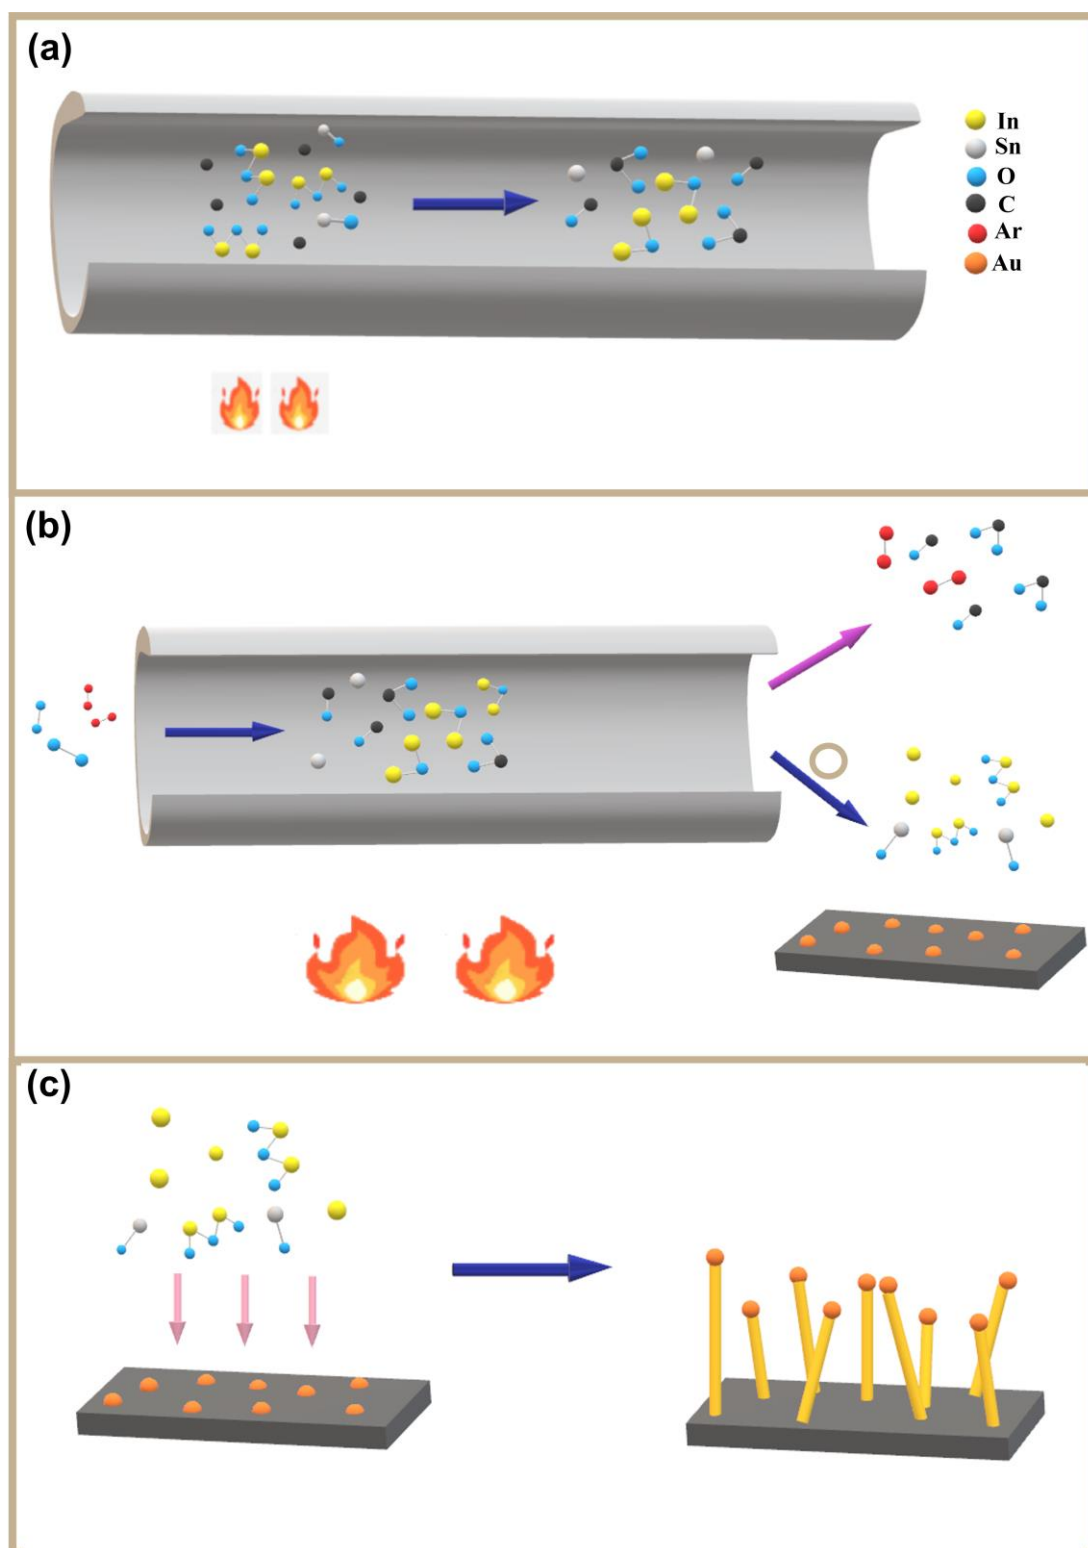

Figure S1 Schematic illustration of the growth mechanism of Zn-In<sub>2</sub>O<sub>3</sub> nanowires.  
The reaction followed the VLS route(a)~(c).

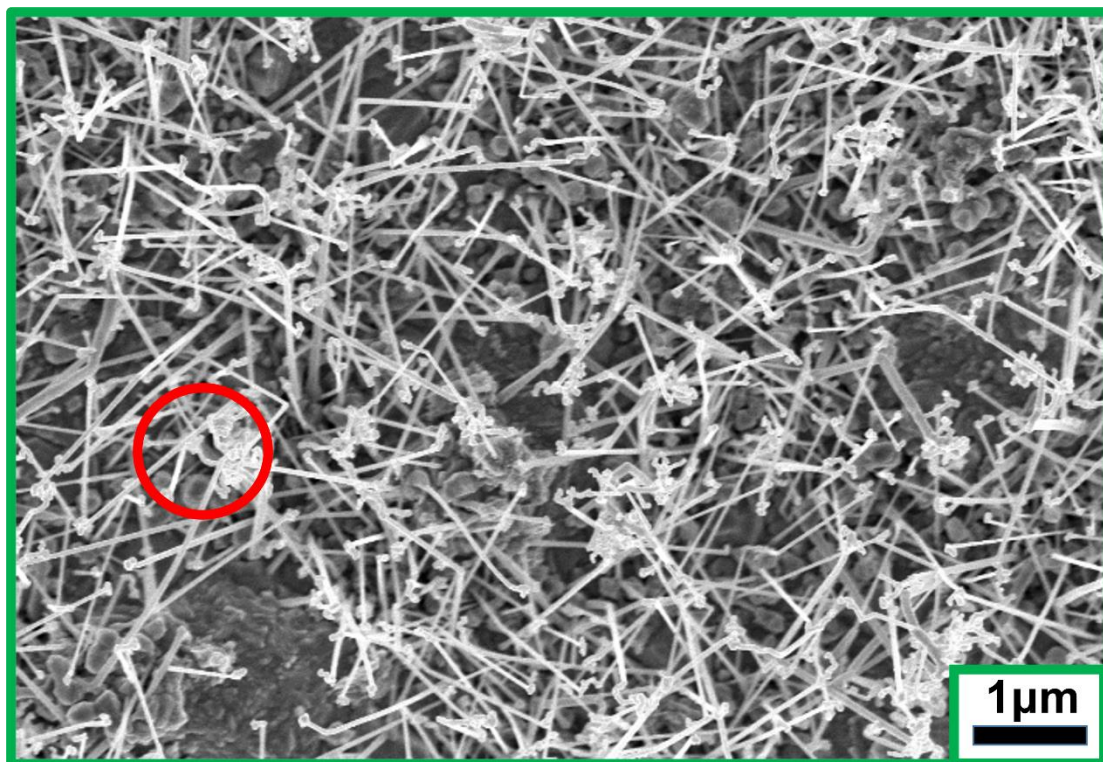

Figure S2 SEM image of zinc clusters on indium oxide nanowires.

(a)

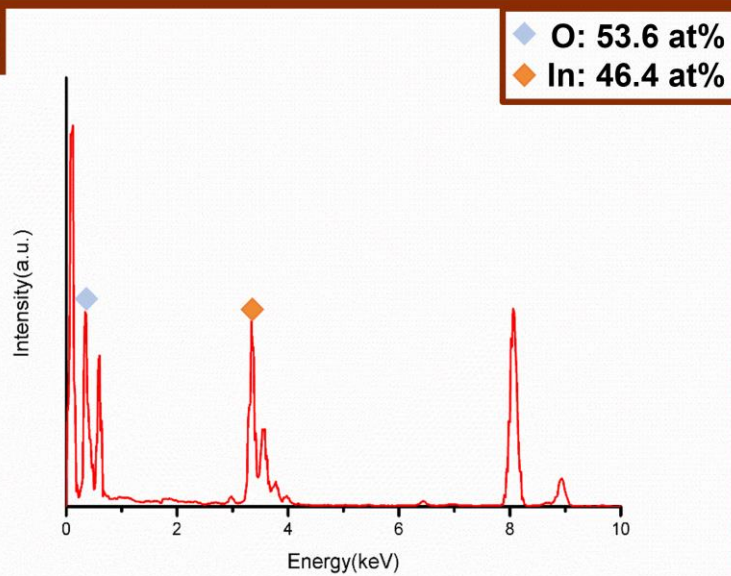

(b)

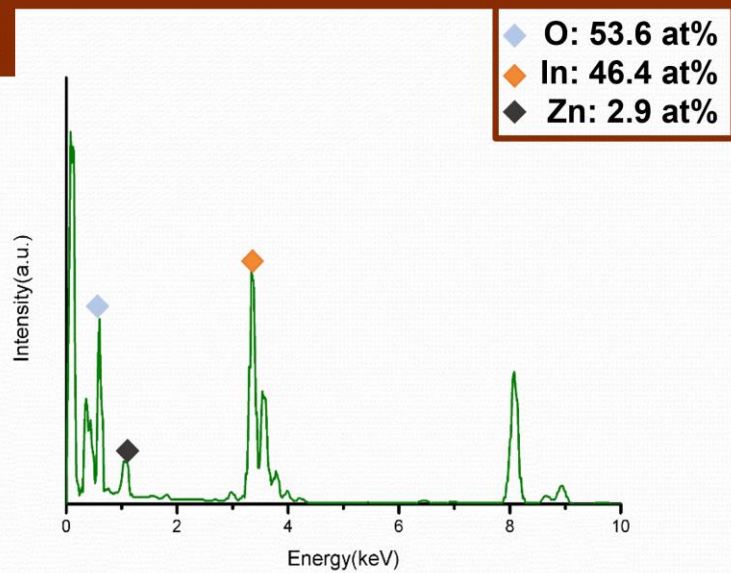

(c)

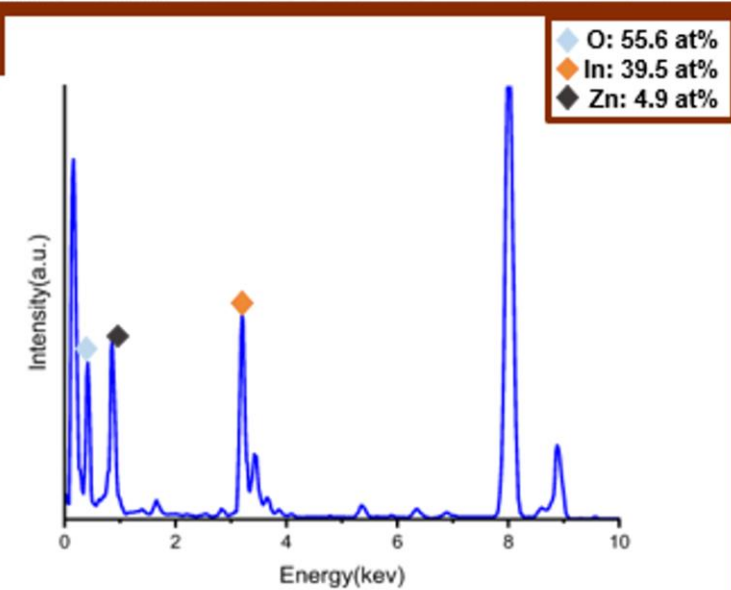

Figure S3 Composition analysis of (a)  $\text{In}_2\text{O}_3$  nanowire (b) 3 at%  $\text{Zn-In}_2\text{O}_3$  nanowire (c) 5 at%  $\text{Zn-In}_2\text{O}_3$  nanowire.

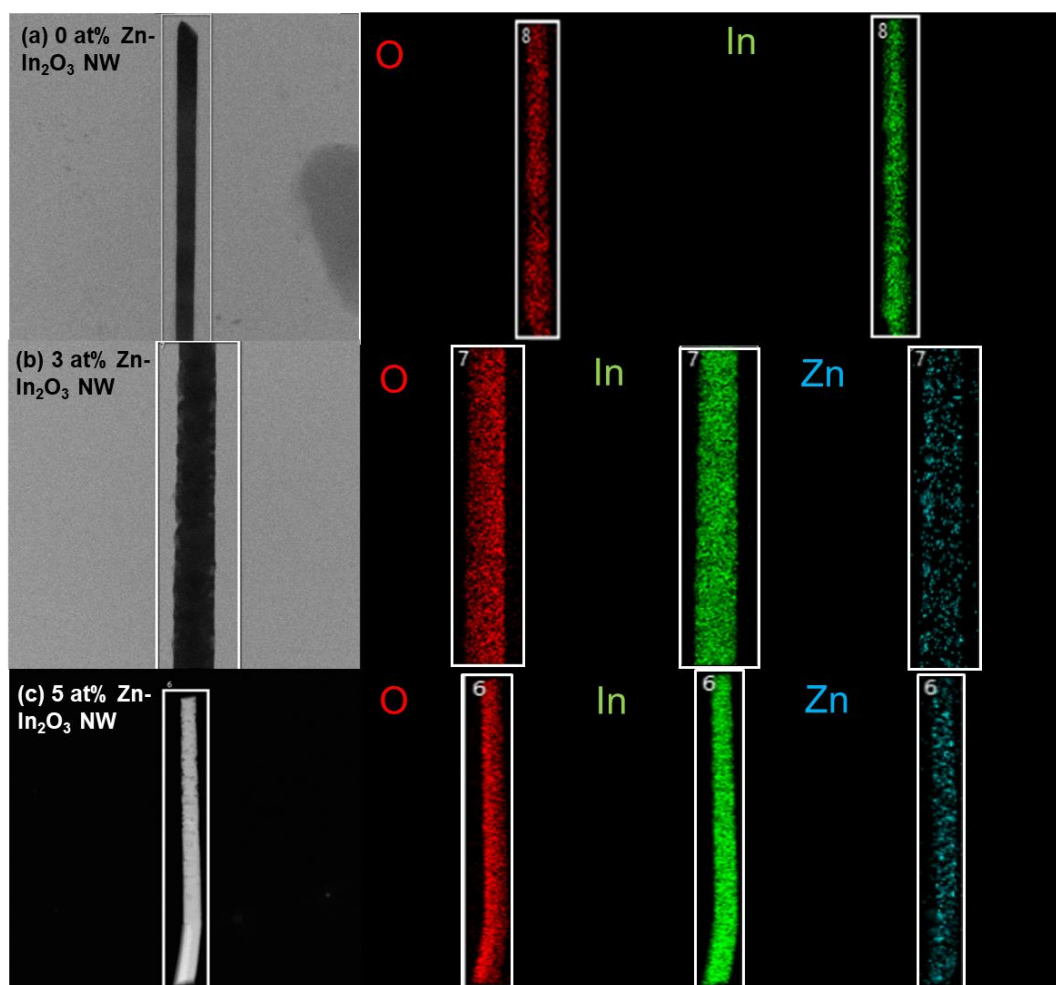

Figure S4 The mapping images of (a)  $\text{In}_2\text{O}_3$  nanowire (b) 3 at%  $\text{Zn-In}_2\text{O}_3$  nanowire (c) 5 at%  $\text{Zn-In}_2\text{O}_3$  nanowire.

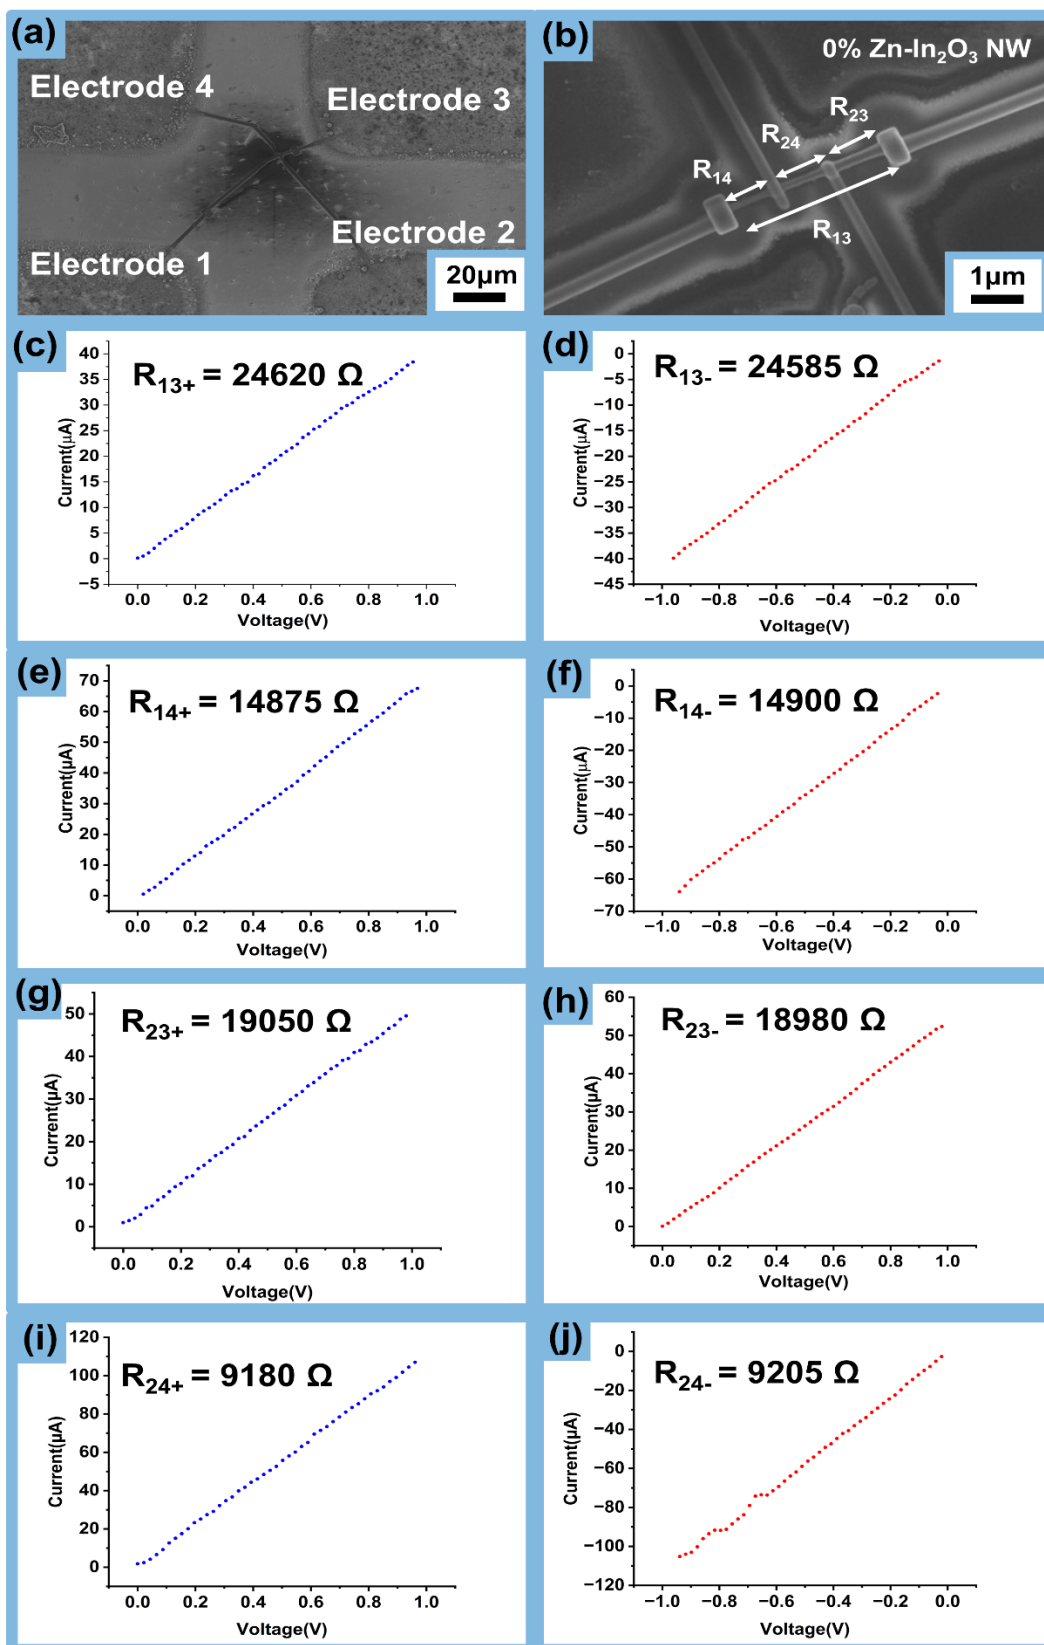

Figure S5. (a,b) SEM images of single In<sub>2</sub>O<sub>3</sub> nanowire-based electrical measurement micro-device. I-V measurements of single In<sub>2</sub>O<sub>3</sub> nanowire. (c) R<sub>13+</sub> (d) R<sub>13-</sub> (e) R<sub>14+</sub> (f) R<sub>14-</sub> (g) R<sub>23+</sub> (h) R<sub>23-</sub> (i) R<sub>24+</sub> (j) R<sub>24-</sub>.



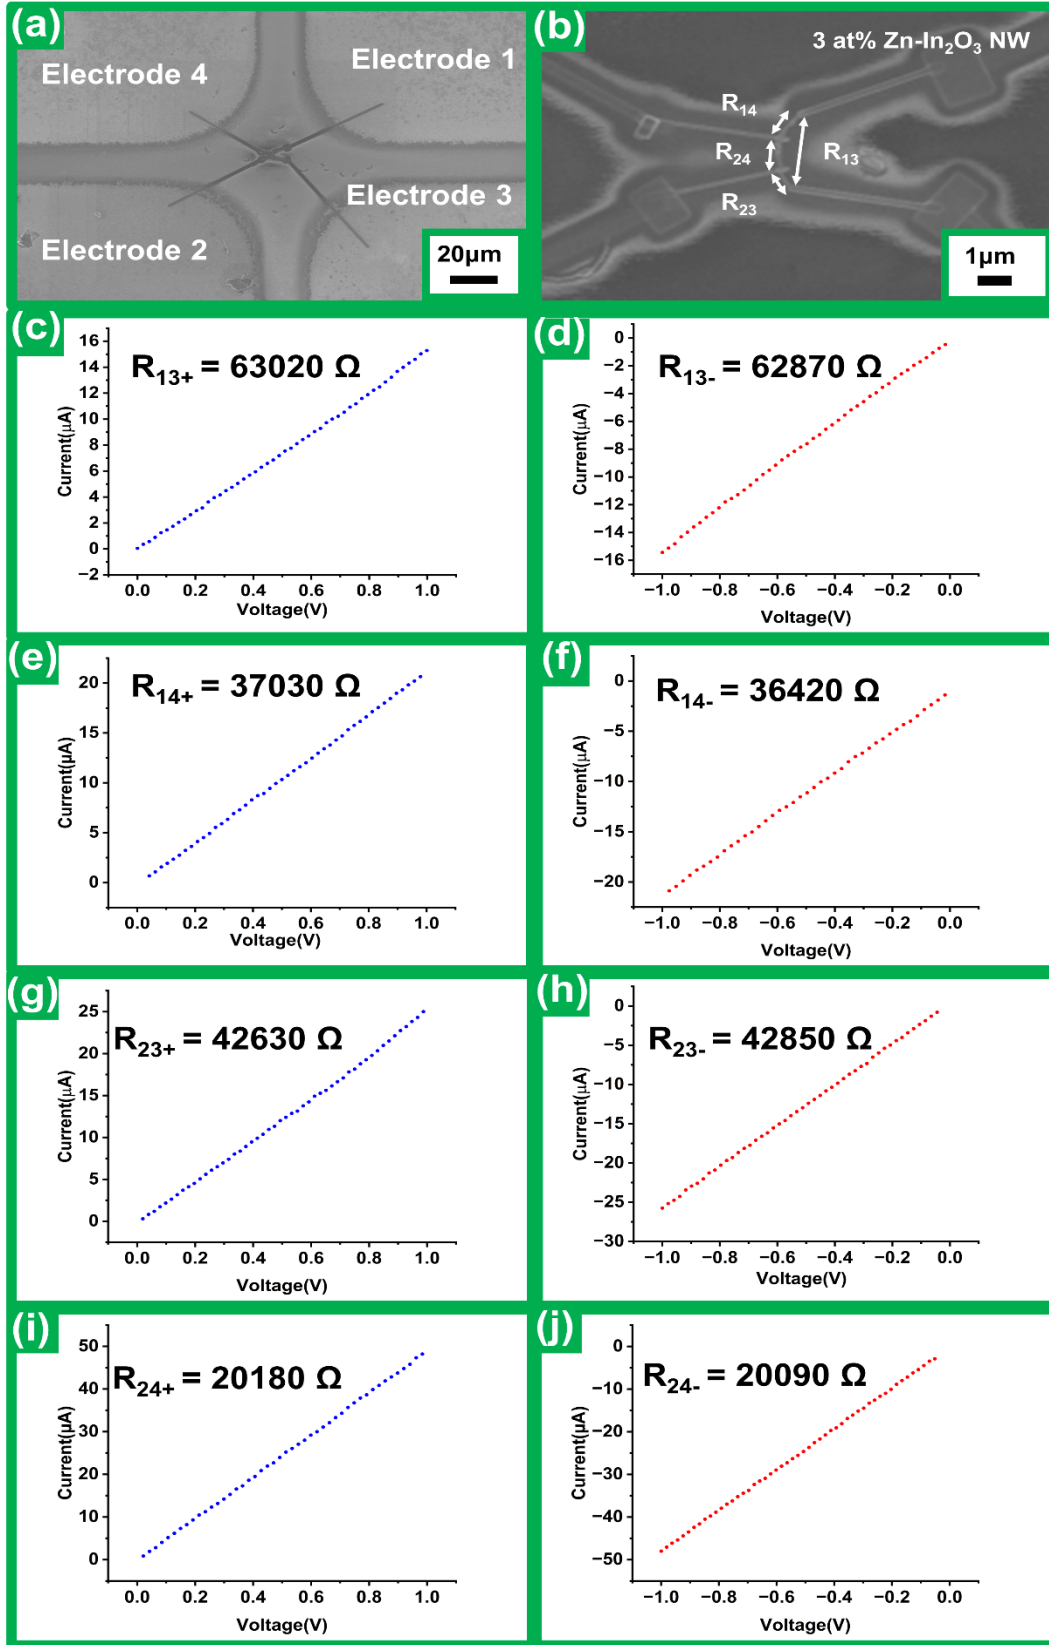

Figure S6. (a,b) SEM image of single 3 at% Zn-In<sub>2</sub>O<sub>3</sub> nanowire-based electrical measurement micro-device. I-V measurements of 3 at% Zn-In<sub>2</sub>O<sub>3</sub> nanowire. (c) R<sub>13+</sub> (d) R<sub>13-</sub> (e) R<sub>14+</sub> (f) R<sub>14-</sub> (g) R<sub>23+</sub> (h) R<sub>23-</sub> (i) R<sub>24+</sub> (j) R<sub>24-</sub>.



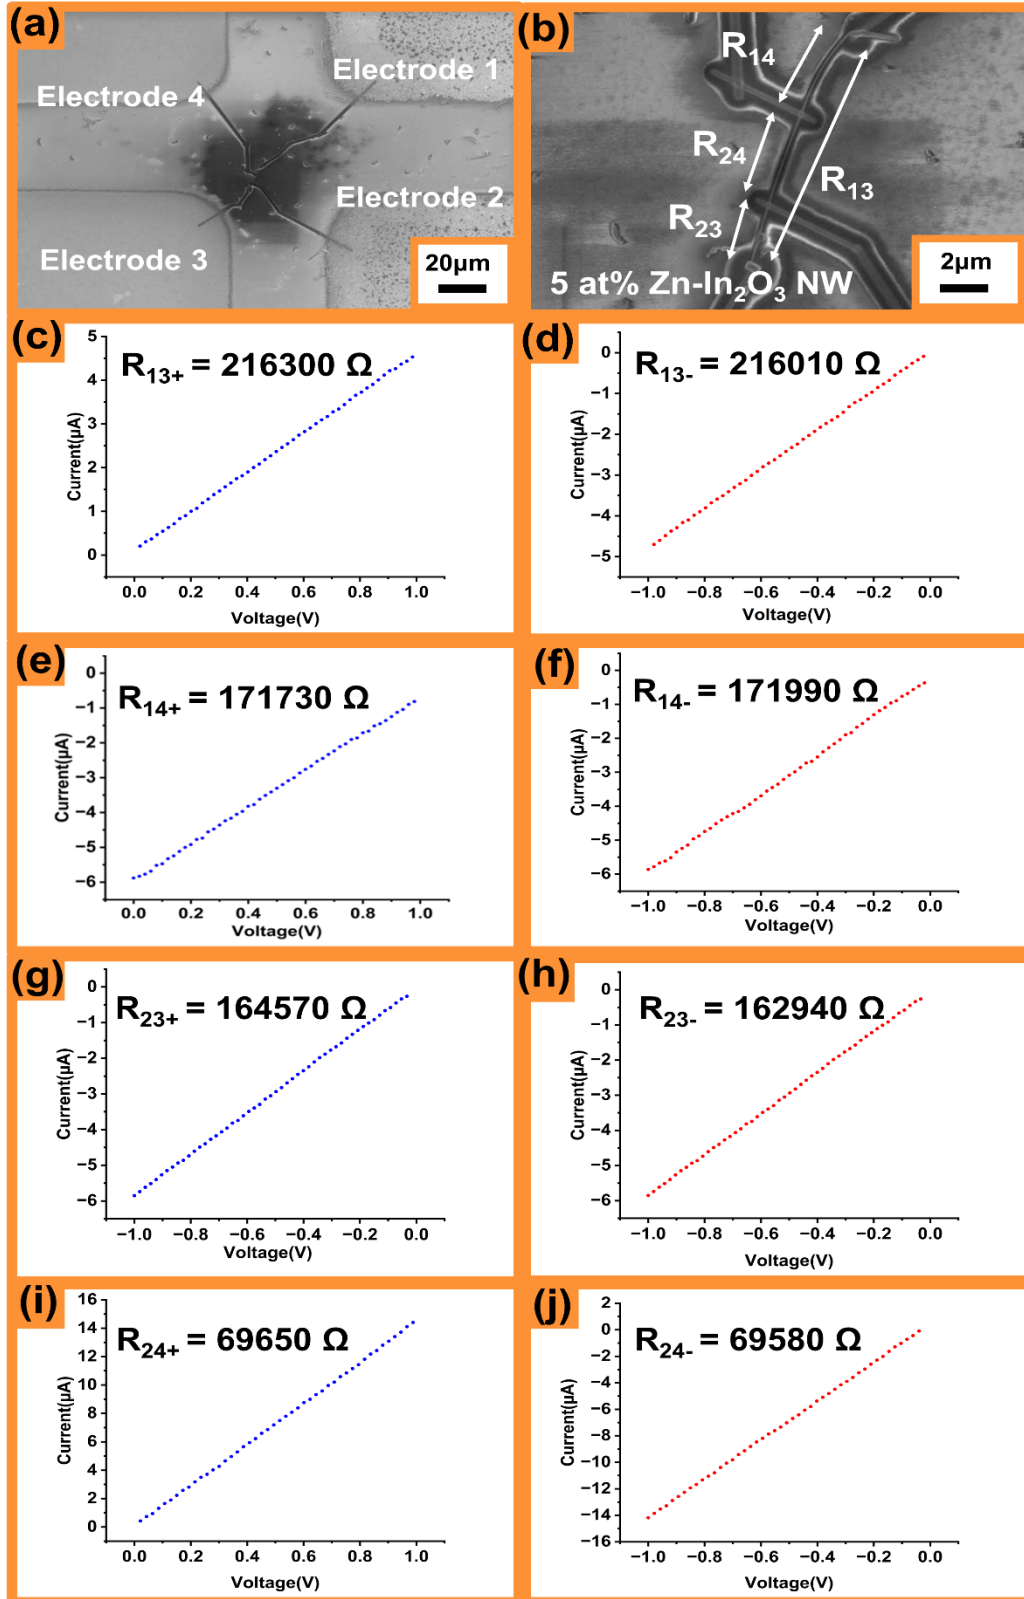

Figure S7. (a,b) SEM image of single 5 at% Zn-In<sub>2</sub>O<sub>3</sub> nanowire-based electrical measurement micro-device. I-V measurements of 5 at% Zn-In<sub>2</sub>O<sub>3</sub> nanowire. (c) R<sub>13+</sub> (d) R<sub>13-</sub> (e) R<sub>14+</sub> (f) R<sub>14-</sub> (g) R<sub>23+</sub> (h) R<sub>23-</sub> (i) R<sub>24+</sub> (j) R<sub>24-</sub>.

# 5 ppm acetone

— 5%Zn-In<sub>2</sub>O<sub>3</sub>  
— 3%Zn-In<sub>2</sub>O<sub>3</sub>  
— In<sub>2</sub>O<sub>3</sub>

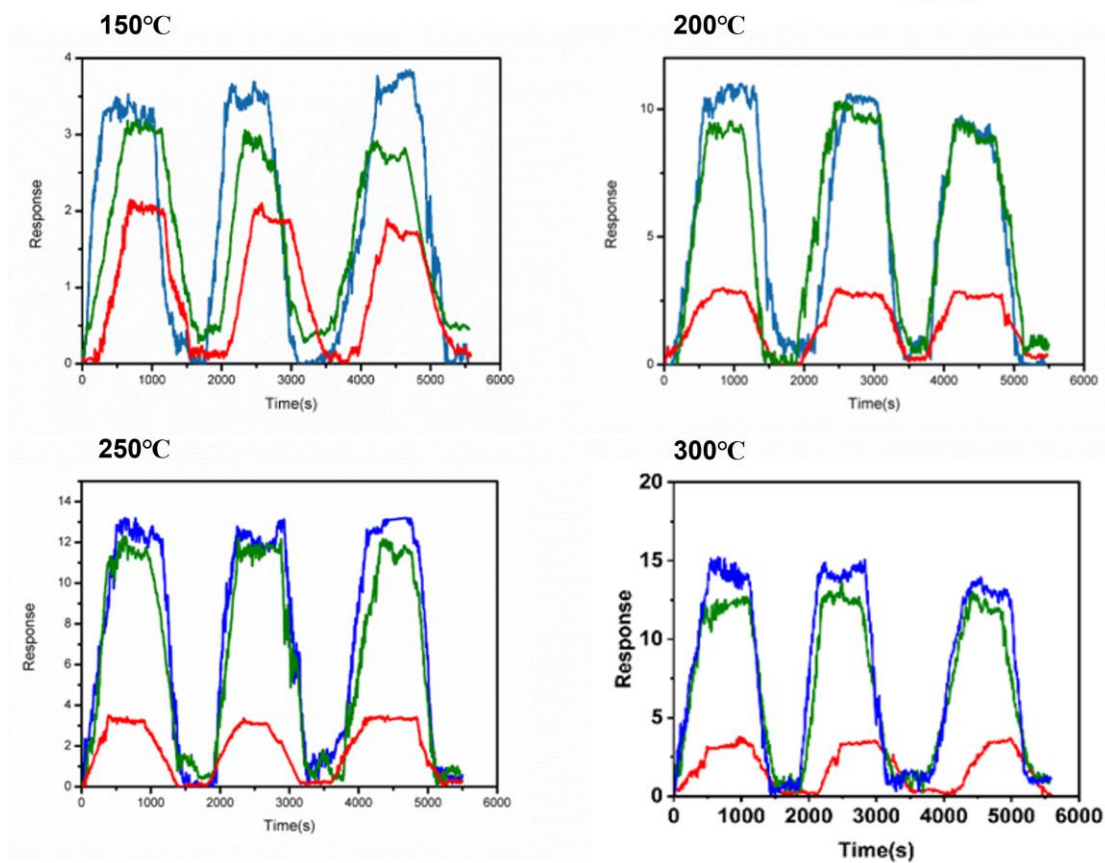

Figure S8. (a-d) Dynamic gas sensing curves of single In<sub>2</sub>O<sub>3</sub> nanowire, 3 at% Zn-In<sub>2</sub>O<sub>3</sub> nanowire and 5 at% Zn-In<sub>2</sub>O<sub>3</sub> nanowire at 150 °C, 200 °C, 250 °C and 300 °C to 5 ppm acetone.

# 5 ppm carbon monoxide

— 5%Zn-In<sub>2</sub>O<sub>3</sub>  
 — 3%Zn-In<sub>2</sub>O<sub>3</sub>  
 — In<sub>2</sub>O<sub>3</sub>

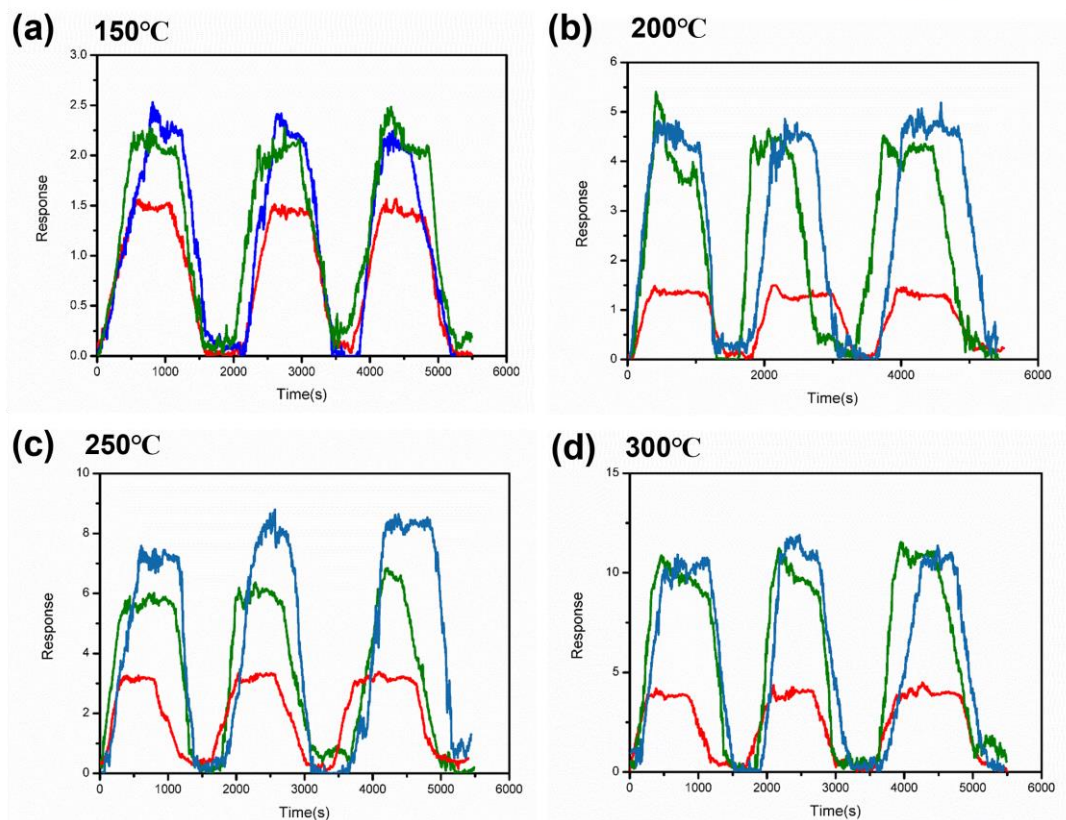

Figure S9. (a-d) Dynamic gas sensing curves of single In<sub>2</sub>O<sub>3</sub> nanowire, 3 at% Zn-In<sub>2</sub>O<sub>3</sub> nanowire and 5 at% Zn-In<sub>2</sub>O<sub>3</sub> nanowire at 150 °C, 200 °C, 250 °C, and 300 °C to 5 ppm carbon monoxide.

# 5 ppm ethanol

— 5%Zn-In<sub>2</sub>O<sub>3</sub>  
— 3%Zn-In<sub>2</sub>O<sub>3</sub>  
— In<sub>2</sub>O<sub>3</sub>

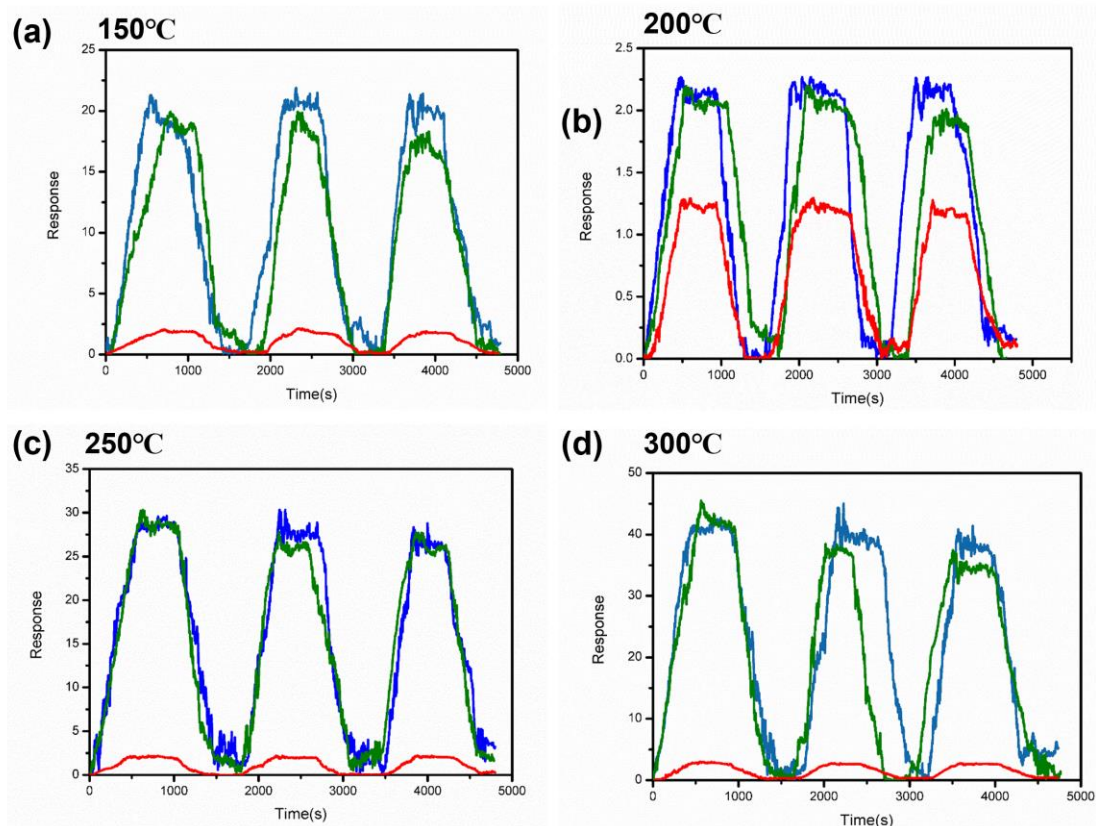

Figure S10. (a-d) Dynamic gas sensing curves of single In<sub>2</sub>O<sub>3</sub> nanowire, 3 at% Zn-In<sub>2</sub>O<sub>3</sub> nanowire and 5 at% Zn-In<sub>2</sub>O<sub>3</sub> nanowire at 150 °C, 200 °C, 250 °C and 300 °C to 5 ppm ethanol.

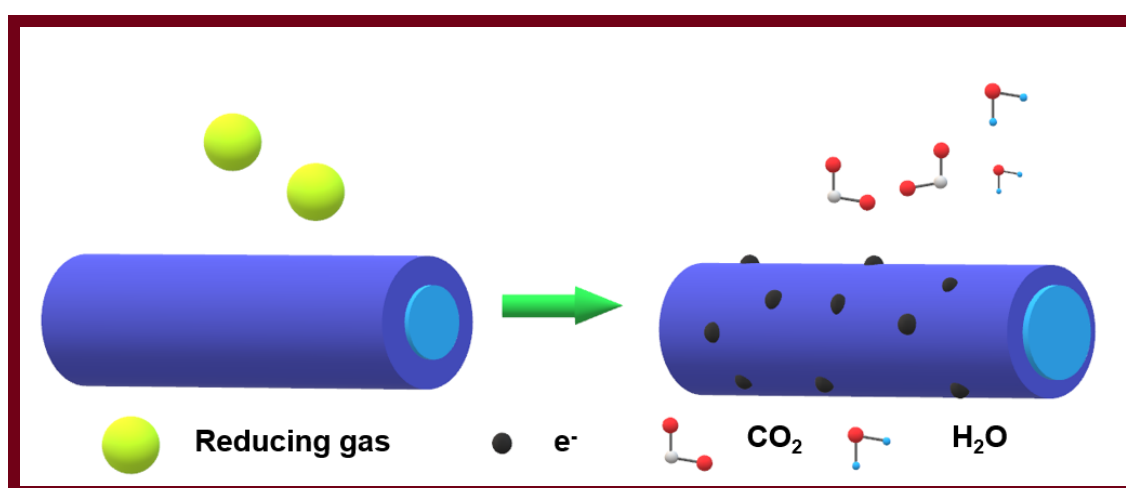

Figure S11. Schematic illustration of the change of electron depletion region after n-type semiconductor absorbs reducing gas.

Table S1. Summary of gas sensing performance of In<sub>2</sub>O<sub>3</sub>, 3 at% Zn-In<sub>2</sub>O<sub>3</sub>, 5 at% Zn-In<sub>2</sub>O<sub>3</sub> nanowires.

| Acetone                              | 150°C | 200°C | 250°C | 300°C |
|--------------------------------------|-------|-------|-------|-------|
| In <sub>2</sub> O <sub>3</sub>       | 2.0   | 2.9   | 3.5   | 3.4   |
| 3% Zn-In <sub>2</sub> O <sub>3</sub> | 2.8   | 9.9   | 12.1  | 12.3  |
| 5% Zn-In <sub>2</sub> O <sub>3</sub> | 3.5   | 10.9  | 13.2  | 13.9  |
| Carbon monoxide                      | 150°C | 200°C | 250°C | 300°C |
| In <sub>2</sub> O <sub>3</sub>       | 1.5   | 1.2   | 3.2   | 3.8   |
| 3% Zn-In <sub>2</sub> O <sub>3</sub> | 2.2   | 3.8   | 6.1   | 10.0  |
| 5% Zn-In <sub>2</sub> O <sub>3</sub> | 2.3   | 4.5   | 7.2   | 10.8  |
| Ethanol                              | 150°C | 200°C | 250°C | 300°C |
| In <sub>2</sub> O <sub>3</sub>       | 1.3   | 1.8   | 2.2   | 2.5   |
| 3% Zn-In <sub>2</sub> O <sub>3</sub> | 2.2   | 18.1  | 30.7  | 36.8  |
| 5% Zn-In <sub>2</sub> O <sub>3</sub> | 2.3   | 20.1  | 29.7  | 40.7  |

Table S2. Comparison with previous sensing studies on In<sub>2</sub>O<sub>3</sub> nanowires with different dopants for 5ppm ethanol.

| Sensing element                                  | Gas concentration | Temperature | Response | Reference |
|--------------------------------------------------|-------------------|-------------|----------|-----------|
| In <sub>2</sub> O <sub>3</sub> NW                | 5ppm              | 300°C       | 2.5      | This work |
| 3% Zn-doped In <sub>2</sub> O <sub>3</sub> NW    | 5ppm              | 300°C       | 36.8     | This work |
| 5% Zn-doped In <sub>2</sub> O <sub>3</sub> NW    | 5ppm              | 300°C       | 40.7     | This work |
| In <sub>2</sub> O <sub>3</sub> NWs               | 20ppm             | 300°C       | 30       | [5]       |
| 5% Sn-doped In <sub>2</sub> O <sub>3</sub> NWs   | 10ppm             | 400°C       | 5        | [22]      |
| 0.5% Co-doped In <sub>2</sub> O <sub>3</sub> NWs | 100ppm            | 300°C       | 16       | [23]      |

Table S3. Comparison with previous sensing studies on In<sub>2</sub>O<sub>3</sub> nanostructures with different dopants for 5ppm acetone.

| Sensing element                                    | Gas concentration | Temperature | Response | Reference |
|----------------------------------------------------|-------------------|-------------|----------|-----------|
| In <sub>2</sub> O <sub>3</sub> NW                  | 5ppm              | 300°C       | 3.4      | This work |
| 3% Zn-doped In <sub>2</sub> O <sub>3</sub> NW      | 5ppm              | 300°C       | 12.3     | This work |
| 5% Zn-doped In <sub>2</sub> O <sub>3</sub> NW      | 5ppm              | 300°C       | 13.9     | This work |
| Electrospinning In <sub>2</sub> O <sub>3</sub> NWs | 10ppm             | 200°C       | 10       | [24]      |
| 3% Ag-doped In <sub>2</sub> O <sub>3</sub> NPs     | 50ppm             | 300°C       | 7        | [25]      |
| 0.5% Co-doped In <sub>2</sub> O <sub>3</sub> NPs   | 5ppm              | 240°C       | 4        | [26]      |
